# Supplementary material
Source: PubMed Central journal article supplement (PMC1976375)
Supplement: blood_blood-2007-04-083873_1.pdf [file blood_blood-2007-04-083873_1.pdf]

| <b>PE</b> | <b>m/z</b> | <b>Erythrocyte ghost</b>                 | <b>DIV</b>                               |
|-----------|------------|------------------------------------------|------------------------------------------|
|           | 686        | (14:0, 18:2)                             |                                          |
|           | 716        | (16:0, 18:1), (16:1, 18:0)               |                                          |
|           | 738        | (16:0, 20:4), (18:2, 18:2)               |                                          |
|           | 742        | (18:1, 18:1), (18:0, 18:2)               |                                          |
|           | 748        | (20:4, 18:0p), (22:5, 16:0p)             |                                          |
|           | 750        | (20:4, 18:0p), (22:4, 16:0p)             |                                          |
|           | 762        | (16:0, 22:6), (16:0, 22:6), (18:2, 20:4) |                                          |
|           | 764        | (16:0, 22:5), (18:1, 20:4)               |                                          |
|           | 766        | (16:0, 22:4), (18:0, 20:4)               | (16:0, 22:4), (18:0, 20:4)               |
| <b>PG</b> | <b>m/z</b> | <b>Erythrocyte ghost</b>                 | <b>DIV</b>                               |
|           | 719        | (16:0,16:1)                              |                                          |
|           | 721        | (16:0,16:0)                              |                                          |
|           | 745        | (16:1,18:1;16:0,18:2)                    |                                          |
|           | 747        | (16:0, 18:1;16:1,18:0)                   |                                          |
|           | 775        | (18:0, 18:1)                             |                                          |
|           | 795        | (16:1,22:4;18:1,20:4)                    |                                          |
|           | 797        | (16:0, 22:4), (18:0, 20:4), (18:1, 20:3) |                                          |
|           | 799        | (18:0, 20:3)                             |                                          |
| <b>PA</b> | <b>m/z</b> | <b>Erythrocyte ghost</b>                 | <b>DIV</b>                               |
|           | 671        | (16:0,18:2)                              | (16:0, 18:2)                             |
|           | 673        | (16:0,18:1)                              | (16:0, 18:1)                             |
|           | 695        | (16:0, 20:4),(18:2, 18:2)                | (16:0, 20:4),(18:2, 18:2)                |
|           | 697        | (16:0, 20:3), (18:1, 18:2)               | (16:0, 20:3), (18:1, 18:2)               |
|           | 699        | (18:1, 18:1), (18:2, 18:0), (16:0, 20:2) | (18:1, 18:1), (18:2, 18:0), (16:0, 20:2) |
|           | 701        | (18:0, 18:1), (16:0, 20:1)               | (16:0, 20:1), (18:0, 18:1)               |
|           | 703        | (18:0, 18:0)                             |                                          |
|           | 719        | (18:2,20:4;16:0,22:6)                    |                                          |
|           | 721        | (16:0, 22:5), (18:1, 20:4)               | (16:0, 22:5), (18:1, 20:4)               |
|           | 723        | (18:1, 20:3), (18:0, 20:4), (16:0, 22:4) | (18:1, 20:3),(16:0, 22:4)                |
| <b>PS</b> | <b>m/z</b> | <b>Erythrocyte ghost</b>                 | <b>DIV</b>                               |
|           | 762        | (16:0, 18:0)                             |                                          |
|           | 786        | (18:0, 18:2), (18:1, 18:1)               | (18:0, 18:2)                             |
|           | 788        | (18:0, 18:1)                             | (18:0, 18:1)                             |
|           | 808        | (18:1, 20:4), (16:0, 22:5)               | (18:1, 20:4)                             |
|           | 810        | (18:0, 20:4)                             | (18:0, 20:4)                             |
|           | 812        | (18:0, 20:3)                             | (18:0, 20:3)                             |
|           | 830        | (20:4,20:4)                              |                                          |
|           | 832        | (18:1, 22:6)                             | (18:1, 22:6), (20:3, 20:4)               |
|           | 834        | (18:0, 22:6)                             | (18:0, 22:6)                             |
|           | 836        |                                          | (18:0, 22:5)                             |
|           | 838        | (18:0, 22:4), (20:0,20:4)                | (18:0, 22:4,sm.20:0,20:4)                |
|           | 854        | (20:4,22:6)                              |                                          |
| <b>PI</b> | <b>m/z</b> | <b>Erythrocyte ghost</b>                 | <b>DIV</b>                               |
|           | 835        |                                          | sm. (16:0,18:1)                          |
|           | 883        |                                          | (16:1, 22:4), (18:1, 20:4)               |
|           | 885        |                                          | (18:0, 20:4), (18:1, 20:3)               |

Numbers in parentheses indicate the carbon chain length of the two associated fatty acids followed by the degree of unsaturation. m/z, mass-to-charge ratio. 'sm' indicates only a small amount of a particular species was found. DIV, drug-induced vesicles.
