# Supplementary material
Source: PubMed Central journal article supplement (PMC1976375)
Supplement: blood_blood-2007-04-083873_2.pdf [file blood_blood-2007-04-083873_2.pdf]

| <b>C:Bond</b> | <b>Erythrocyte ghost</b> | <b>DIV</b> |
|---------------|--------------------------|------------|
| 30:1          | -                        |            |
| 32:2          | -                        |            |
| 32:1          | +                        |            |
| 32:0          | +                        | +          |
| 34:3          | +                        |            |
| 34:2          | +/-                      | +          |
| 34:1          |                          | +          |
| 34:0          | +                        | +          |
| 36:5          | +                        | +          |
| 36:4          | +                        | +          |
| 36:3          |                          | +          |
| 36:2          | +/-                      | +          |
| 36:1          | +                        | +          |
| 36:0          |                          | +          |
| 38:6          | +                        | +          |
| 38:5          | +                        | +          |
| 38:4          | +                        | +          |
| 38:3          |                          | +          |
| 38:2          | +                        | +          |
| 38:1          | +                        | +          |
| 40:6          | +                        | +          |
| 40:4          | +                        |            |

+ indicates detection by positive mode MS; - by negative mode MS. Numbers indicate combined carbon chain length of both associated fatty acids followed by the total degree of unsaturation. m/z, mass-to-charge ratio. DIV, drug-induced vesicles.
